# Supplementary material for: Reduced translucency and the addition of black patterns increase the catch of the greenhouse whitefly, Trialeurodes vaporariorum, on yellow sticky traps
Source: PLoS One. 2018 Feb 15;13(2):e0193064. doi: 10.1371/journal.pone.0193064 (PMC5814052; doi:10.1371/journal.pone.0193064)
Supplement: S1 File — Spreadsheet with raw data from experiments A-F. (XLSX) [file pone.0193064.s001.xlsx]

## Sheet: Expt A
Reduced translucency and the addition of black patterns increase the catch of the greenhouse whitefly, Trialeurodes vaporariorum, on yellow sticky traps
Sampson, Covaci, Hamilton, Hassan, Al-Zaidi & Kirk
Experiment A
Trial in 2016
Treatment: single = single thickness of trap type R1; double = double thickness of trap type R1
WF = total whitefly adults on trap
Block	Treatment	WF
1	single	6
1	double	56
2	single	11
2	double	41
3	single	0
3	double	37
4	single	5
4	double	13
5	single	4
5	double	31
6	single	3
6	double	25
Trial in 2017
Treatment: single = single thickness of trap type R1; double = double thickness of trap type R1
WFF = whitefly adult females on trap
WFM = whitefly adult males on trap
Block	Treatment	WFF	WFM
1	single	1	14
2	single	4	11
3	single	1	5
4	single	2	7
5	single	3	11
6	single	2	26
7	single	2	11
8	single	3	17
9	single	4	22
1	double	13	87
2	double	4	34
3	double	12	43
4	double	10	27
5	double	13	41
6	double	7	41
7	double	13	54
8	double	4	51
9	double	10	49

## Sheet: Expt B
Reduced translucency and the addition of black patterns increase the catch of the greenhouse whitefly, Trialeurodes vaporariorum, on yellow sticky traps
Sampson, Covaci, Hamilton, Hassan, Al-Zaidi & Kirk
Experiment B
Treatment: 1 = trap type R1 single thickness; 2 = trap type R2 single thickness
WF = total whitefly adults on trap
Block	Treatment	WF
1	1	194
1	2	1049
2	1	566
2	2	1092
3	1	189
3	2	1528
4	1	331
4	2	628
5	1	771
5	2	966
6	1	541
6	2	1328
7	1	518
7	2	651
8	1	602
8	2	812
9	1	153
9	2	769

## Sheet: Expt C
Reduced translucency and the addition of black patterns increase the catch of the greenhouse whitefly, Trialeurodes vaporariorum, on yellow sticky traps
Sampson, Covaci, Hamilton, Hassan, Al-Zaidi & Kirk
Experiment C
Treatment: single = single thickness of trap type R2; double = double thickness of trap type R2
WF = total whitefly adults on trap
Block	Treatment	WF
1	single	6
1	double	17
2	single	11
2	double	15
3	single	22
3	double	27
4	single	50
4	double	70
5	single	11
5	double	18
6	single	19
6	double	12
7	single	15
7	double	40
8	single	15
8	double	19

## Sheet: Expt D
Reduced translucency and the addition of black patterns increase the catch of the greenhouse whitefly, Trialeurodes vaporariorum, on yellow sticky traps
Sampson, Covaci, Hamilton, Hassan, Al-Zaidi & Kirk
Experiment D
Size: large = large trap; small = small trap
Pattern: no = no pattern; yes = with pattern
WF = total whitefly adults on trap
Block	Size	Pattern	WF
1	large	no	19
2	large	no	35
3	large	no	20
4	large	no	34
5	large	no	12
6	large	no	20
7	large	no	8
8	large	no	21
9	large	no	14
10	large	no	21
11	large	no	5
12	large	no	2
13	large	no	13
14	large	no	8
15	large	no	29
16	large	no	16
17	large	no	12
18	large	no	18
19	large	no	45
20	large	no	13
1	large	yes	36
2	large	yes	56
3	large	yes	29
4	large	yes	20
5	large	yes	55
6	large	yes	7
7	large	yes	44
8	large	yes	10
9	large	yes	15
10	large	yes	44
11	large	yes	88
12	large	yes	59
13	large	yes	42
14	large	yes	16
15	large	yes	44
16	large	yes	105
17	large	yes	47
18	large	yes	18
19	large	yes	21
20	large	yes	95
1	small	no	95
2	small	no	19
3	small	no	8
4	small	no	29
5	small	no	19
6	small	no	4
7	small	no	100
8	small	no	41
9	small	no	8
10	small	no	11
11	small	no	15
12	small	no	8
13	small	no	1
14	small	no	13
15	small	no	32
16	small	no	8
17	small	no	12
18	small	no	12
19	small	no	10
20	small	no	11
1	small	yes	19
2	small	yes	78
3	small	yes	11
4	small	yes	32
5	small	yes	70
6	small	yes	9
7	small	yes	35
8	small	yes	88
9	small	yes	18
10	small	yes	52
11	small	yes	21
12	small	yes	8
13	small	yes	25
14	small	yes	15
15	small	yes	6
16	small	yes	21
17	small	yes	43
18	small	yes	65
19	small	yes	11
20	small	yes	21

## Sheet: Expt E
Reduced translucency and the addition of black patterns increase the catch of the greenhouse whitefly, Trialeurodes vaporariorum, on yellow sticky traps
Sampson, Covaci, Hamilton, Hassan, Al-Zaidi & Kirk
Experiment E
Treatment: Pattern = trap with pattern; plain = trap without pattern
FT = whitelies on front top of trap
FM = whitelies on front middle of trap
FB = whitelies on front bottom of trap
BT = whitelies on back top of trap
BM = whitelies on back middle of trap
BB = whitelies on back bottom of trap
WF = total whiteflies on trap
Block	Treatment	FT	FM	FB	BT	BM	BB	WF
1	Pattern	41	44	32	74	84	51	326
1	Plain	28	26	34	53	39	51	231
2	Pattern	26	18	13	40	38	20	155
2	Plain	15	10	12	42	32	20	131
3	Pattern	22	36	16	38	59	46	217
3	Plain	15	6	27	24	16	30	118
4	Pattern	32	32	11	16	30	19	140
4	Plain	17	14	13	30	9	16	99
5	Pattern	32	38	21	45	81	45	262
5	Plain	13	3	10	28	9	10	73
6	Pattern	6	21	8	28	31	15	109
6	Plain	32	12	18	21	19	25	127
7	Pattern	5	21	14	39	69	39	187
7	Plain	23	15	16	52	37	59	202
8	Pattern	15	22	6	16	31	13	103
8	Plain	15	9	24	13	3	11	75
9	Pattern	12	21	8	11	13	9	74
9	Plain	8	1	2	13	8	15	47
10	Pattern	7	15	4	15	28	15	84
10	Plain	11	3	9	4	5	13	45
11	Pattern	9	14	13	20	28	19	103
11	Plain	11	16	17	19	15	24	102
12	Pattern	6	11	16	8	20	8	69
12	Plain	3	3	10	8	9	7	40
13	Pattern	16	22	8	16	32	14	108
13	Plain	5	2	6	7	9	11	40
14	Pattern	3	24	11	4	14	8	64
14	Plain	1	6	5	4	6	5	27
15	Pattern	3	11	5	7	11	6	43
15	Plain	2	3	5	4	5	7	26
16	Pattern	38	50	35	79	99	57	358
16	Plain	45	37	43	56	52	68	301
17	Pattern	33	49	24	60	87	40	293
17	Plain	49	40	50	58	31	29	257

## Sheet: Expt F
Reduced translucency and the addition of black patterns increase the catch of the greenhouse whitefly, Trialeurodes vaporariorum, on yellow sticky traps
Sampson, Covaci, Hamilton, Hassan, Al-Zaidi & Kirk
Experiment F
Treatment: C = plain trap; D = trap with light grey pattern; E = trap with mid grey pattern; F = trap with black pattern
WF = whitefly adults on front of trap
Counts of all whiteflies on front of trap
Block	Treatment	WF
1	C	10
2	C	8
3	C	8
4	C	0
5	C	6
6	C	1
7	C	6
8	C	3
9	C	16
10	C	68
11	C	11
12	C	6
13	C	3
14	C	1
15	C	2
16	C	2
17	C	15
18	C	15
19	C	1
20	C	6
1	D	20
2	D	7
3	D	18
4	D	8
5	D	3
6	D	5
7	D	1
8	D	10
9	D	10
10	D	14
11	D	30
12	D	4
13	D	14
14	D	1
15	D	3
16	D	5
17	D	27
18	D	1
19	D	24
20	D	3
1	E	17
2	E	7
3	E	6
4	E	14
5	E	7
6	E	3
7	E	6
8	E	27
9	E	15
10	E	5
11	E	42
12	E	9
13	E	5
14	E	1
15	E	11
16	E	8
17	E	133
18	E	4
19	E	5
20	E	10
1	F	106
2	F	12
3	F	3
4	F	6
5	F	8
6	F	21
7	F	12
8	F	8
9	F	11
10	F	9
11	F	16
12	F	29
13	F	1
14	F	32
15	F	10
16	F	9
17	F	110
18	F	6
19	F	7
20	F	32
WFF = whitefly adult females on trap
WFM = whitefly adult males on trap
Counts of female and male whiteflies on the front of the plain and black traps
Block	Treatment	WFF	WFM
1	C	7	4
2	C	5	4
3	C	3	5
4	C	0	0
5	C	3	3
6	C	0	1
7	C	5	1
8	C	1	2
9	C	8	9
10	C	34	32
11	C	4	6
12	C	5	1
13	C	2	1
14	C	0	0
15	C	1	1
16	C	2	0
17	C	7	9
18	C	10	5
19	C	5	1
20	C	1	1
1	F	66	50
2	F	10	1
3	F	1	1
4	F	3	3
5	F	5	3
6	F	9	12
7	F	6	6
8	F	5	3
9	F	4	7
10	F	4	3
11	F	6	9
12	F	18	10
13	F	1	0
14	F	20	12
15	F	8	2
16	F	7	2
17	F	56	51
18	F	4	2
19	F	3	4
20	F	19	15

## Sheet: Expt G
Reduced translucency and the addition of black patterns increase the catch of the greenhouse whitefly, Trialeurodes vaporariorum, on yellow sticky traps
Sampson, Covaci, Hamilton, Hassan, Al-Zaidi & Kirk
Experiment G
Treatment: C = trap type R1 without pattern; D = trap type R1 with pattern; E = trap type R2 without pattern; F = trap type R2 with pattern
WF = total whiteflies on trap
Block	Treatment	WF
1	C	68
1	D	63
1	E	182
1	F	125
2	C	71
2	D	104
2	E	142
2	F	137
3	C	61
3	D	253
3	E	311
3	F	169
4	C	138
4	D	117
4	E	411
4	F	330
5	C	287
5	D	190
5	E	650
5	F	235
6	C	226
6	D	512
6	E	849
6	F	325
7	C	289
7	D	580
7	E	467
7	F	504
8	C	370
8	D	596
8	E	924
8	F	828
9	C	189
9	D	302
9	E	480
9	F	354
10	C	173
10	D	325
10	E	667
10	F	306
